# Supplementary material for: Plasmid replication-associated single-strand-specific methyltransferases
Source: PubMed Central journal article supplement (PMC7736820; doi:10.1093/nar/gkaa1163), 2020-12-03
Supplement: gkaa1163_supplemental_file.pdf [file gkaa1163_supplemental_file.pdf]

**SUPPLEMENTARY TABLES AND FIGURES.**

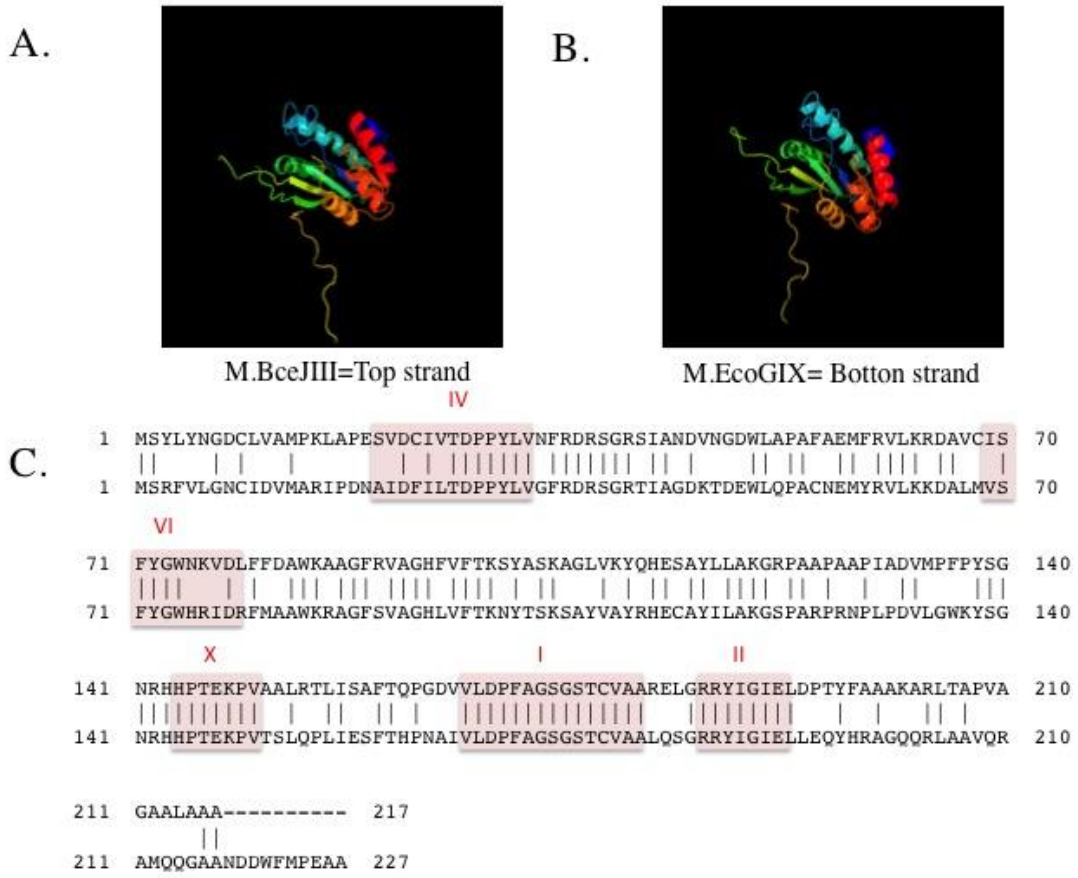

**Supplementary Figure 1.** Structural modeling analysis of A) M.BceJIII and B) M.EcoGIX using Phyre2 ( Protein Homology/analogy Recognition Engine V2.0). C) Amino-acid sequence alignment of M.BceJIII and M.EcoGIX. Roman numerals correspond to conserved motifs in m6A DNA MTases.

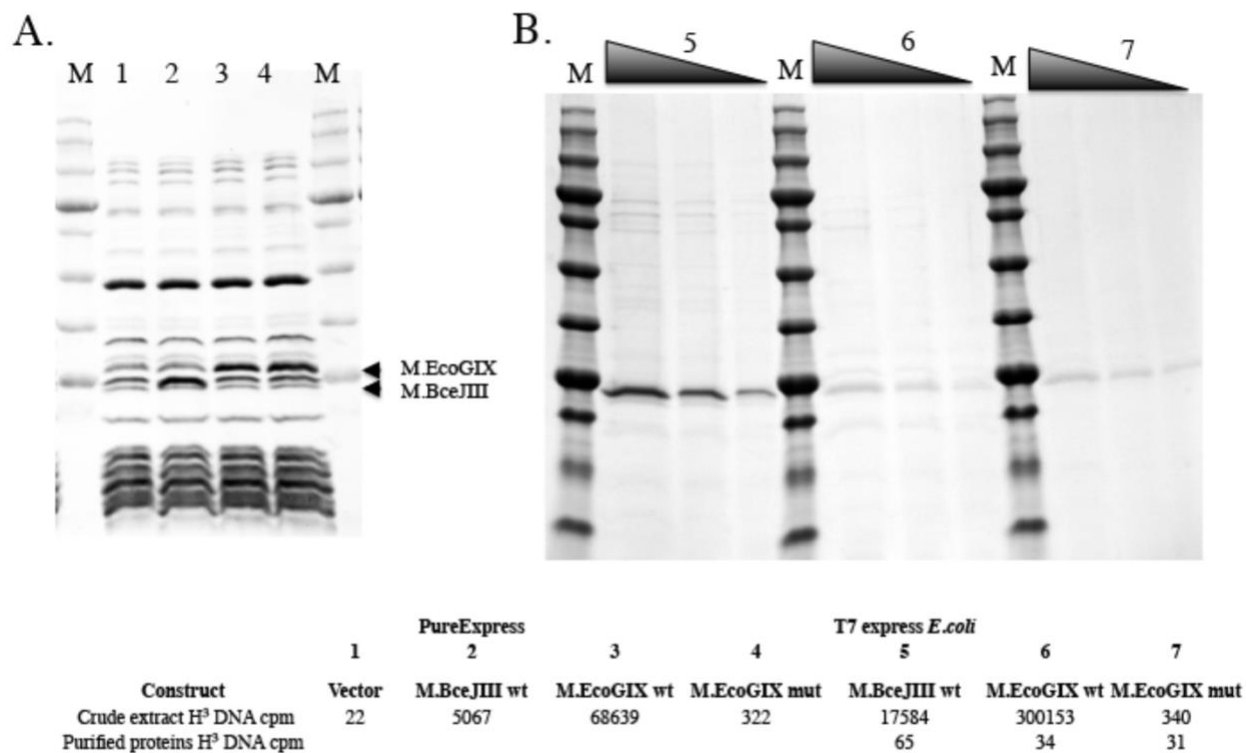

**Supplementary Figure 2.** Activity loss during purification of His-tagged variant proteins. Panel A: PURExpress reactions from 1) empty vector pSAPv6 or 6xHis-tagged Xa linked variants of 2) pAF9: M.BceJIII WT, 3) pAF10: M.EcoGIX WT and 4) pAF11: M.EcoGIX APPA mutant. Panel B: Dilutions fractions from three-column purified fractions from lysates of T7 Express (ER2566) expressing 5) M.BceJIII WT, 6) M.EcoGIX WT and 7) M.EcoGIX APPA variant. Panel C: MTase activity measured with [H<sup>3</sup>]SAM with single-stranded M13mp18 DNA as a substrate. Top row: lanes 1-4, activity in the PureExpress reactions of panel A; lanes 5-7 activity measured in crude extracts of the expression constructs. Bottom row: activity measured following purification (fractions of panel B).

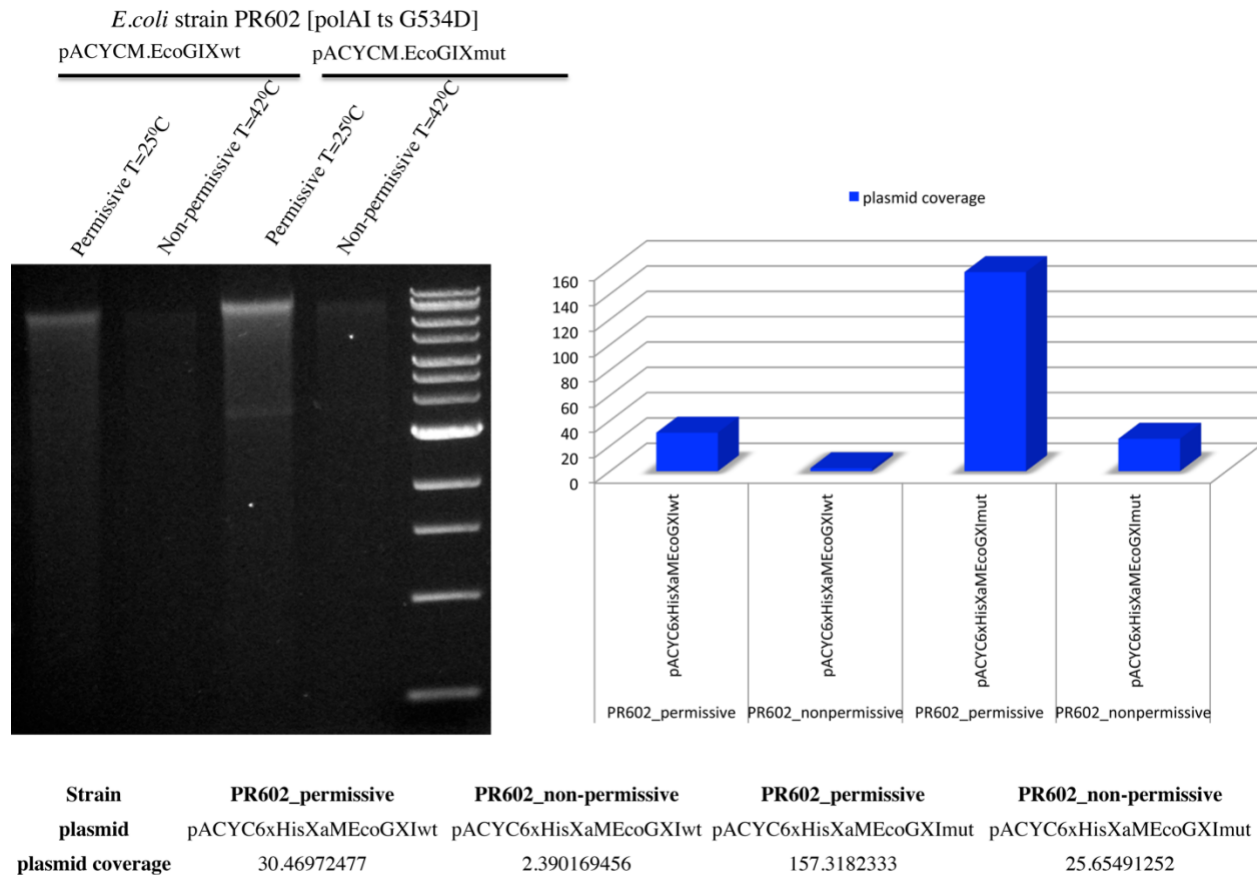

**Supplementary Figure 3.** p15A copy number depends on both plasmid *ecoGIXM* allele and chromosomal *polA*. Ethidium bromide-stained agarose gel of plasmid DNA carrying WT or the APPA mutant of *ecoGIXM* isolated from *polA*ts cells grown at the permissive or nonpermissive temperature. Sequencing yielded estimates of copy number per chromosome as in Figure 2. Lane 1 and 2: pAF5, *ecoGIXM* WT; Lanes 3 and 4 pAF6, *ecoGIXM* mut

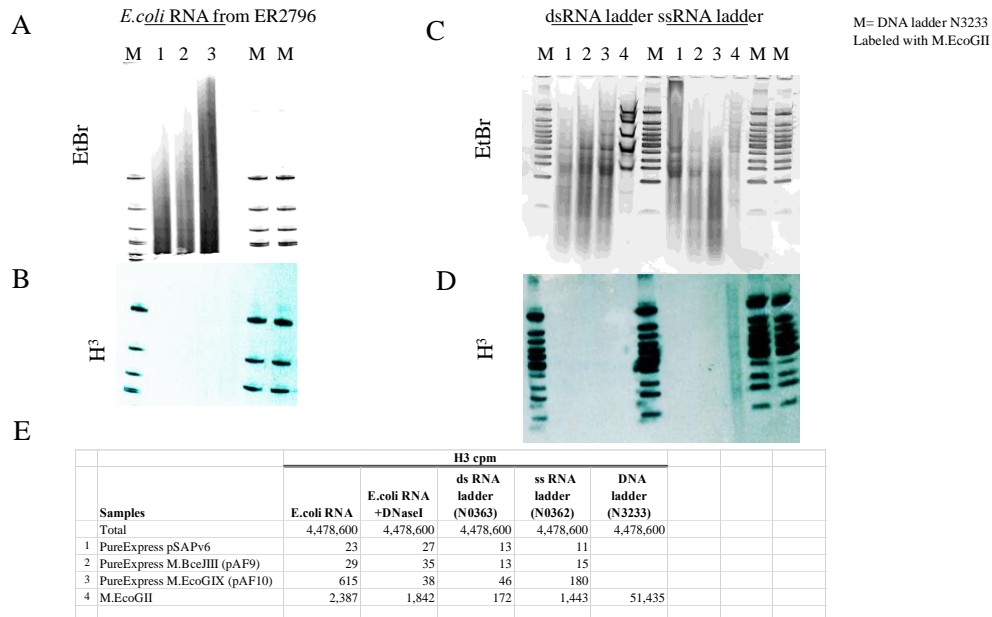

### Supplementary Figure 4 RNA is not a substrate.

[ $H^3$ ]SAM labelling reactions: Panels A and B, substrate was total RNA from a non-modifying host; panels C and D, substrates were double-stranded (N0363) and single-stranded RNA (N0362) size markers. Substrates (1  $\mu$ g) incubated with 5  $\mu$ l of PurExpress products of Lanes 1: Vector pSAPv6; lanes 2 pAF9 expressing M.BceJIII; lanes 3: pAF10 expressing M.EcoGIX; or with lanes 4: control DNA MTase M.EcoGII. Control lanes M: DNA ladder N3233 substrate labelled with nonspecific M.EcoGII. Panels A and B: photographs of EtBr-stained gels; Panels C and D: Fluorographs of the gels of A and B. Panel E: counts of total [ $H^3$ ] in each reaction before and after repurification of RNA with Monarch RNA purification columns. The same enzyme sources were used to modify single- and double-stranded M13 DNA in Supplementary Table 5.

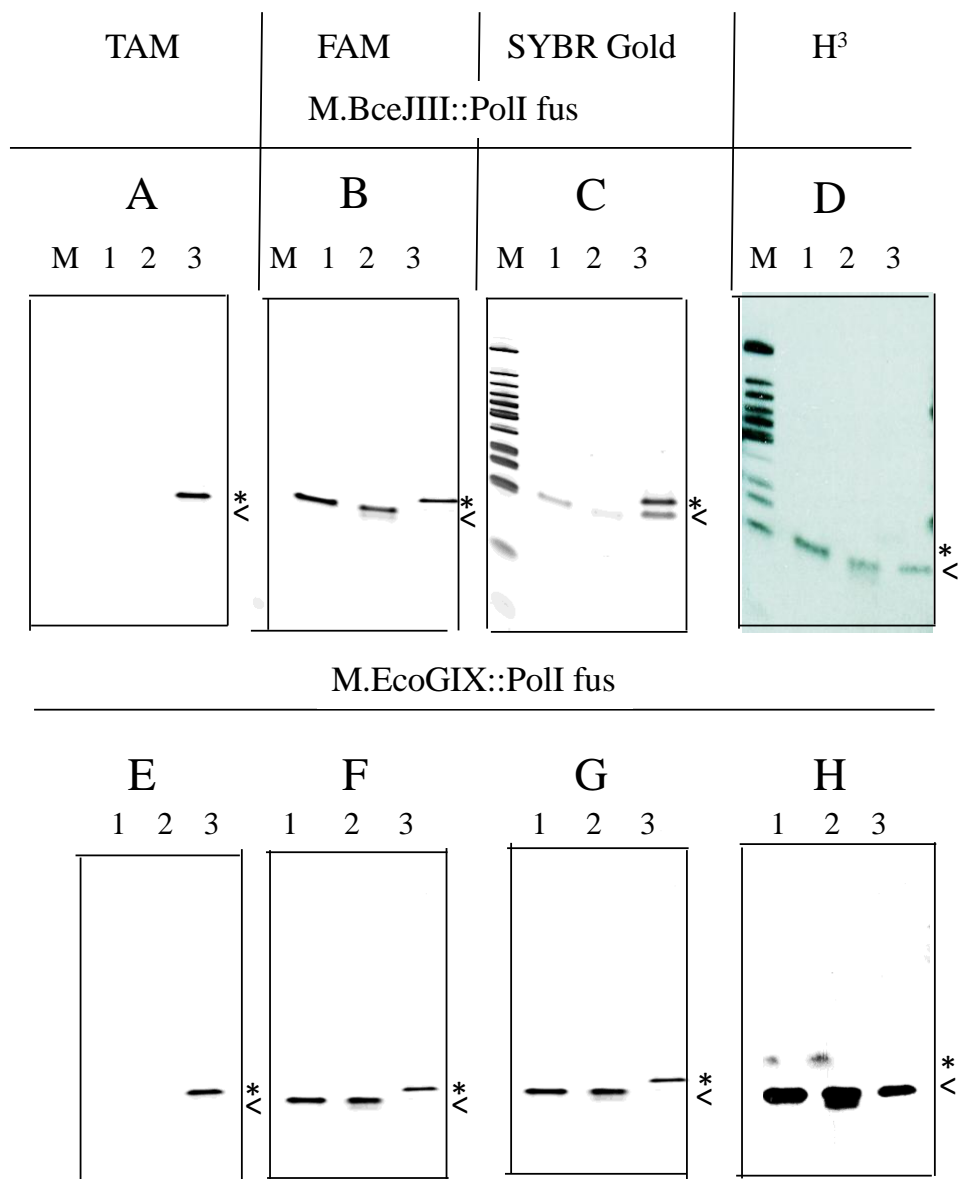

**Supplementary Figure 5.** Single- but not double-stranded oligonucleotides are modified by PolI-MTase fusions.

Complementary oligonucleotides labelled with TAM (lanes 1; #464 of Supplementary Table 3) or FAM (lanes 2; #467 of Supplementary Table 3) were annealed (lanes 3) and used as substrates for modification reactions in the presence of [H<sup>3</sup>]SAM. M: NEB N3233 marker labeled at A residues with [H<sup>3</sup>]SAM. (\*): the position of the annealed (ds) oligonucleotides; (<): position of the single-stranded oligonucleotide. MTase reactions were active (QHP) methylase fractions of fusion proteins 6xHis::M.BceJIII::PolI (panels A-D) and 6xHis::Xa:M.EcoGIX::PolI (panel E-H). A Typhoon reader detected TAM (488nm), FAM (532nm) and SYBR Gold (detecting DNA). [H<sup>3</sup>]-modified DNA (Panels D and H) was detected by fluorography as described in Materials and Methods. The annealed species (lanes 3) still contains some single-stranded substrate, most visible in panel C. The FAM-labelled oligo (lanes 2) shows a small amount of a faster-moving species, most visible in panel H. More-pronounced labelling by M.EcoGIX::PolI than M.BceJIII::PolI is consistent with modification activity seen in Figure 4.

**Supplementary Table 1. List of Strains.**

| <b><i>E. coli</i> strains</b> | <b>Genotype/Phenotype</b>                                                                                                                                                                                                                                                                       | <b>Source</b>          | <b>Reference</b>                                                                                                                                                                                                                                                                             |
|-------------------------------|-------------------------------------------------------------------------------------------------------------------------------------------------------------------------------------------------------------------------------------------------------------------------------------------------|------------------------|----------------------------------------------------------------------------------------------------------------------------------------------------------------------------------------------------------------------------------------------------------------------------------------------|
| ER2683                        | Cloning strain: F128 (ER2250)<br><i>proA+B+ lacIq Δ(lacZ)M15 zcf::miniTn10(KanR) / fhuA2::IS2 Δ(lacI-lacA)200 glnX44 e14- rfbD1? relA1? endA1 spoT1? thi-1 Δ(yjiT-opgB)114::IS10</i>                                                                                                            | Raleigh E. (NEB)       | Lin,L.F., Posfai,J., Roberts,R.J. and Kong,H. (2001) Comparative genomics of the restriction-modification systems in Helicobacter pylori. Proc Natl Acad Sci USA, 98, 2740-2745.                                                                                                             |
| ER3081                        | T7 expression strain: <i>IN(IS1_26-Δ(yjiT-opgB)114::IS10-IS1_1) fhuA2::IS2 lacZ::T7gene1 [plon::IS186] del[aaad-ompT-cusS] del(galK-yghJ) psuA211(-37 T-&gt;C) uvrY::IS1::del(yecF-dcm-hchA) mcrX73::(mTn10 tetA::IS10) IN(speA210::IS10-xanA::IS10) endA1(E208K) attB::(pCD13-lysY, lacIq)</i> | Samuelson J. (NEB)     | Platt,R., Drescher,C., Park,S.-K. and Phillips,G. (2000) Genetic system for reversible integration of DNA constructs and lacZ gene fusions into the Escherichia coli chromosome. Plasmid, 43, 12–23.                                                                                         |
| ER2796                        | Methylation-deficient strain: <i>fhuA2 Δ(lacZ)r1 glnV44 trp-31 dcm-6 his-1 zed-501::Tn10 argG6 rpsL104 dam-16::Kan xyl-7 mtl-2 metR1 mcr-62 Δ(mcrB-hsd-mrr)114</i>                                                                                                                              | Anton B., et al. (NEB) | Anton B.P., Mongodin E.F., Agrawal S., Fomenkov A., Byrd D.R., Roberts R.J., Raleigh E.A. (2015) Complete Genome Sequence of ER2796, a DNA Methyltransferase-Deficient Strain of Escherichia coli K-12. PloS One, 10 (5)                                                                     |
| ER3661                        | Methylation-deficient strain to propagate M13 phage: F128<br><i>proABlacIq 'ZΔM15 mini-Tn10Cm/ fhuA2 Δ(lacZ)r1 glnV44 trp-31 dcm-6 his-1 zed-501::Tn10 argG6 rpsL104 dam-16::Kan xyl-7 mtl-2 metR1 mcr-62 Δ(mcrB-hsd-mrr)114</i>                                                                | This study             |                                                                                                                                                                                                                                                                                              |
| MKW278                        | MG1655 <i>ΔlacZ::cat</i>                                                                                                                                                                                                                                                                        | Yamaichi 2015          | Yamaichi, Y., Chao, M.C., Sasabe, J., Clark, L., Davis, B.M., Yamamoto, N., Mori, H., Kurokawa, K., Waldor, M.K. (2015) High-resolution genetic analysis of the requirements for horizontal transmission of the ESBL plasmid from Escherichia coli O104:H4. Nucleic Acids Res., 43, 348-360. |
| YBB1214                       | MKW278 / pDM142 (pBAD33 EcoGIIR+m+)                                                                                                                                                                                                                                                             | Yamaichi 2015          |                                                                                                                                                                                                                                                                                              |
| bEYY1132                      | SM10 lambda pir / pEYY56                                                                                                                                                                                                                                                                        | This study             |                                                                                                                                                                                                                                                                                              |
| bEYY1133                      | SM10 lambda pir / pEYY57                                                                                                                                                                                                                                                                        | This study             |                                                                                                                                                                                                                                                                                              |
| bEYY1137                      | MC1061 / pESBL INV ( <i>oriT</i> )                                                                                                                                                                                                                                                              | This study             |                                                                                                                                                                                                                                                                                              |
| bEYY1138                      | MC1061 / pESBL INV ( <i>oriT-nikAB</i> )                                                                                                                                                                                                                                                        | This study             |                                                                                                                                                                                                                                                                                              |
|                               |                                                                                                                                                                                                                                                                                                 |                        |                                                                                                                                                                                                                                                                                              |

## Supplementary Table 2. List of Plasmids.

Supplementary Table 2 Plasmids.xlsx

| Plasmids and Phage DNA |                                   |            | Expression promot |          |
|------------------------|-----------------------------------|------------|-------------------|----------|
| Plasmid name           | in process name                   | Origin     | promoter          | Mtase    |
| pRRS                   | pRRSlac                           | ColE1      | <i>lacp</i>       | (vector) |
| pAF1                   | pRRStetM.BceJIII wt               | ColE1      | <i>tetp</i>       | BceJIII  |
| pAF2                   | pRRStetM.BceJIII mut              | ColE1      | <i>tetp</i>       | BceJIII  |
| pEYY63                 | pEYY63                            | ColE1      | <i>lacp</i>       | EcoGIX   |
| pAF3                   | pRRSlacM.EcoGIX wt                | ColE1      | <i>lacp</i>       | EcoGIX   |
| pAF4                   | pRRSlacM.EcoGIX mut               | ColE1      | <i>lacp</i>       | EcoGIX   |
| pAF5                   | pACYCDtet_6xHis::Xa::M.EcoGIXwt   | p15A       | <i>tetp</i>       | EcoGIX   |
| pAF6                   | pACYCDtet_6xHis::Xa::M.EcoGIXmut  | p15A       | <i>tetp</i>       | EcoGIX   |
| pAF7                   | pSYX20_Cm_6xHis::Xa::M.EcoGIXwt#2 | pSC101     | <i>tetp</i>       | EcoGIX   |
| pAF8                   | pSYX20_Cm_6xHis::Xa::M.EcoGIXwt#5 | pSC101 inv | <i>tetp</i>       | EcoGIX   |
| pAF9                   | pSAPV6xHis::MBceJIIIwt            | p15A       | <i>T7p</i>        | BceJIII  |
| pAF10                  | pSAPV6xHis::Xa::M.EcoGIX wt       | p15A       | <i>T7p</i>        | EcoGIX   |
| pAF11                  | pSAPV6xHis::Xa::M.EcoGIX mut      | p15A       | <i>T7p</i>        | EcoGIX   |

### Supplementary Table 3. List of Oligonucleotides and primers.

Supplementary Table 3 Oligonucleotides.xlsx

#### PCR and cloning oligos

| Accession # | In process name                 | sequence                                                                  |
|-------------|---------------------------------|---------------------------------------------------------------------------|
| P1          | pRRStet_M.BceJIII_Sbf_NdeIF_69  | ttagttgCCTGCAGGttaaggttaacatATGAGCTATTTGTACAACGGCGACTG                    |
| P2          | pRRStet_M.BceJIII_NdeI_His_Xa_F | ttatactgcagcatATGaccatcaccatcaccatATAGAGGGGCGGAGCTATTTGTAC<br>AACGGCGACTG |
| P3          | pRRStet_M.BceJIII_BglIIR        | CGCAGATCTTTAGGCGGCGGCCAACG                                                |
| P4          | pM.BceJIII_72F_mut              | TTTTCGCGATCGCAGCGGC                                                       |
| P5          | pM.BceJIII_APPA_R_mut           | TTCACGAGGgcAGGCGGGgCCGT                                                   |
| P6          | pRRSlac_M.EcoGXI_PstI_NdeIF     | ttagttgCTGCAGttaaggttaacatATGTCCCCTTTTGTCTCGGTAAC                         |
| P7          | pRRSlac_M.EcoGXI_BamHR          | cattcagatccTTATTACGCAGCCTCCGGCATAAAC                                      |
| P8          | pACYC_6xHis_Xa_MEcoG_Nde_67F    | caggaaggttaacatATGaccatcaccatcaccatATAGAGGGGCGGTCCCCTTTTGT<br>CCTCGGTAAC  |
| P9          | pACYC_M.EcoGIX_Bam_69R          | gaggtgcccgggettccattcagatccTTATTACGCAGCCTCCGGCATAAAC                      |
| P10         | pMEcoGIX_73F_mut                | GTTTTCGTGACCGTTCCGG                                                       |
| P11         | pMEcoGIX_APPA_R_mut             | CGACGAGGgcCGGCGGggcAG                                                     |
| P12         | pACYC_tet_64_vector_rev         | catatgttaaacctcCTGCGTTAGCAATTTAACTGTGATAAACT                              |
| P13         | pACYC_tet_64_vector_for         | taaGGATCCtgaatggaagccggeg                                                 |
| P14         | oYo157                          | ATGTTCTTTCGAAAACTCACGTAAAGGGATTTTGGT                                      |
| P15         | oYo158                          | TCAGTGGAACTGCGTTATCCCCGTATTCT                                             |
| P16         | oYo159                          | GTGAGTTTTCGAAAGAACAATGTGAGCAAAAAGGCCAGC                                   |
| P17         | oYo160                          | GATAACGCAGGTTCCACTGAGCGTCAGACCC                                           |
| P23         | oYo107                          | GCGGAGTGATATCAAGCTTATCGAAAGCCCTGGTATTTATGCC                               |
| P29         | oYo109                          | GAATGTACTGAACAGTGGCCGTAGTCTTATGCAGACGGCAG                                 |
| P28         | oYo111                          | TTGTGAGCGGATAACAATTTGTGGTTGACCGCAACGTGAACATG                              |
| P30         | oYo112                          | CTGCCGTCTGCATAAGACTACGGCCACTGTTTCAGTACATTC                                |



Supplementary Table 3 Oligonucleotides.xlsx

|                           |                               |                                                                                                       |
|---------------------------|-------------------------------|-------------------------------------------------------------------------------------------------------|
| P27                       | oYo142                        | GCCTGTTATTTTTGTGCATCGTAAGGAGCCTGAAGTGAGTG                                                             |
| P32                       | oYo143                        | GGCCGCGCCAGAATCCGGCGTAGTCTTATGCAGACGGCAG                                                              |
| P34                       | oYo144                        | CTGCCGTCTGCATAAGACTACGCCGATTCTGGCGCG                                                                  |
| P35                       | oYo145                        | GAATGTACTGAACAGTGGCCGTGATGCACAAAAATAACAGGC                                                            |
| P33                       | oYo146                        | GCCTGTTATTTTTGTGCATCACGGCCACTGTTCACTACATTC                                                            |
| *same as P14              | oYo157                        | ATGTTCTTTTCGAAAACCTCACGTTAAGGGATTTTGGT                                                                |
| *same as P15              | oYo158                        | TCAGTGGAACCTGCGTTATCCCCCTGATTCT                                                                       |
| *same as P16              | oYo159                        | GTGAGTTTTTCGAAAGAACATGTGAGCAAAAAGGCCAGC                                                               |
| *same as P17              | oYo160                        | GATAACGCAGGTTCCACTGAGCGTCAGACCC                                                                       |
|                           | pSAPv6_6xHis_69F              | ttaagaaggagatacatATGcaccatcaccatcA                                                                    |
| P19                       | pSAPV6_PolAI_BamH_67R         | gggtcgcgaagagcggatccTTAGTGCGCCTGATCCCAG<br>TTCAATTTGTAATACCTAATCGTGGTGTGACTAAGCAactagtcttATG          |
| P20                       | PolAI_Spe_67F                 | GTTTCAGATCCCCCAAATCC<br>GATTAGGTATTACAAATTGAAGAATATGGTCTTTgctagcATACGCAG                              |
| P21                       | pEcoGIX_WO_stop_Nhe_69R       | CCTCCGGCATAAAC<br>GATTAGGTATTACAAATTGAAGAATATGGTCTTTgctagcATAGGCG                                     |
| P22                       | pBceIII_WO_stop_Nhe_69R       | GCGGCCAAC                                                                                             |
| <b>PacBio adapter</b>     |                               |                                                                                                       |
|                           | PacBio adapter_direct         | 5'-ATCTCTCTCTTTTCTCCTCCTCCGTTGTTGTTGTTGAGAGAGAT<br>5'-<br>ATCTCTCTCAACAACAACAACGGAGGAGGAGGAAAAGAGAGAG |
|                           | PacBio adapter_rev_complement | AT                                                                                                    |
| <b>Sequencing primers</b> |                               |                                                                                                       |
|                           | pTetF                         | GTTGTAATTCTCATGTTTGACAGC                                                                              |
|                           | pTetR                         | GTTCTGCCAAGGGTTGGTTTGCGC                                                                              |
|                           | S1224                         | CGCCAGGGTTTTCCAGTCACGAC                                                                               |
|                           | S1233                         | AGCGGATAACAATTTACACAGGA                                                                               |
|                           | S1248                         | TAATACGACTCACTATAGGG                                                                                  |
|                           | S1271                         | TATGCTAGTTATTGCTCAG                                                                                   |

Supplementary Table 3 Oligonucleotides.xlsx

**M.BceJIII Modification substrate**

|         |                                                   |                                                                                                                       |
|---------|---------------------------------------------------|-----------------------------------------------------------------------------------------------------------------------|
| 464_TAM | two SAY sites indicated in bold and underlined    | 5'TAM-GTATAG <b><u>ATGTGAT</u></b> GAATATACCTGTTTATGTGGCAACCGAAATAGTTATG-464_TAM                                      |
| 467_FAM | eight SAY sites indicated in bold and underlined) | 5' FAM-TGG <b><u>ACATA</u></b> AACTATTTCCGGTTG <b><u>CCACATA</u></b> AAACAGGTATATTC <b><u>CATCACAT</u></b> CT-467_FAM |

**Supplementary Table 4.** Active MTase alleles confer sensitivity to EcoKMrr.

| Recipient host:        |        |               |             | Permissive (Mrr <sup>+</sup> ) | Restrictive (Mrr <sup>-</sup> ) | R/P              |      |        |
|------------------------|--------|---------------|-------------|--------------------------------|---------------------------------|------------------|------|--------|
| Plasmids (from ER2796) |        |               |             |                                |                                 |                  |      |        |
| Replicon               | Allele | Promoter      | Col per tf  | Morph                          | Col per tf                      | Morph            | ~EOT |        |
| pAF5                   | p15A   | M.EcoGIX wt   | <i>tetp</i> | ~10 <sup>5</sup>               | S (17 N)                        | 5                | N*   | ~1E-4  |
| pAF6                   | p15A   | M.EcoGIX mut  | <i>tetp</i> | ~10 <sup>5</sup>               | N                               | ~10 <sup>5</sup> | N    | ~1     |
| pAF3                   | ColE1  | M.EcoGIX wt   | <i>lacp</i> | ~10 <sup>5</sup>               | N                               | ~10 <sup>3</sup> | S    | ~0.01  |
| pAF4                   | ColE1  | M.EcoGIX mut  | <i>lacp</i> | ~10 <sup>5</sup>               | N                               | ~10 <sup>5</sup> | N    | ~1     |
| pAF1                   | ColE1  | M.BceJIII wt  | <i>tetp</i> | ~10 <sup>6</sup>               | N                               | ~10 <sup>3</sup> | S    | ~0.001 |
| pAF2                   | ColE1  | M.BceJIII mut | <i>tetp</i> | ~10 <sup>6</sup>               | N                               | ~10 <sup>5</sup> | N    | ~0.1   |
| pAF7                   | pSC101 | M.EcoGIX wt   | <i>tetp</i> | ~10 <sup>6</sup>               | N                               | ~10 <sup>6</sup> | N    | ~1     |

Colonies per transformation reaction (Col per tf) upon transformation (10 ng of plasmid) into permissive (ER1969, Mrr<sup>-</sup>) or restrictive (ER1516, Mrr<sup>+</sup>) strains when plated selectively. Morph (morphology): S, small: <0.5 mm; N, normal, ~2 mm after overnight incubation; EOT: efficiency of transformation (restrictive host (R)/permissive host (P)). The propagation host ER2796 does not modify, so only plasmid-specified modification is present. Plasmids carried expression configurations of wild type (WT) or disabled (mut) alleles of *ecoGIXM* (Sm6AY) or *bceJIIIM* (m6A). \*chose for sequencing

**Supplementary Table 5. DNA substrate control for Supplementary Figure 4**

|   |                                           | <b>H3 cpm</b>             |                   |                           |
|---|-------------------------------------------|---------------------------|-------------------|---------------------------|
|   | <b>Samples</b>                            | <b>M13mp18<br/>SS DNA</b> | <b>M13m18 RFI</b> | <b>lambda<br/>HindIII</b> |
|   | Total cpm added                           | 4,478,600                 | 4,478,600         | 4,478,600                 |
| 1 | PureExpress<br>pSAPv6                     | 24                        | 50                |                           |
| 2 | PureExpress<br>M.BceJIII (pAF9)           | 601                       | 24                |                           |
| 3 | PureExpress<br>M.EcoGIX<br>(pAF10)        | 15,338                    | 622               |                           |
| 4 | M.EcoGII                                  | 205,370                   | 135,510           | 144,700                   |
| 5 | Pure Express<br>M.EcoGIX::Poli<br>(pAF14) | 8,357                     | 153               |                           |

**Supplementary Table 6.** Summary of polypeptides interacting with active and inactive 6xHis::M.BceJIII detected by LC-MS.

| Control #Spec | Active MBceJIII_QFF #Spec | Inactive MBceJIII_QFF_Hep #Spec | Avg. Mass | Description                                                                                                |
|---------------|---------------------------|---------------------------------|-----------|------------------------------------------------------------------------------------------------------------|
| 0             | 51                        | 247                             | 24819     | 6xHisX_M.BceJIIIwt                                                                                         |
| 3             | 87                        | 5                               | 103118    | gb ACT45542.1 DNA polymerase I [Escherichia coli BL21(DE3)]                                                |
| 0             | 57                        | 45                              | 40324     | gb ACT41997.1 cell division protein FtsZ [Escherichia coli BL21(DE3)]                                      |
| 9             | 481                       | 9                               | 17545     | gb ACT44958.1 30S ribosomal protein S5 [Escherichia coli BL21(DE3)]                                        |
| 0             | 370                       | 0                               | 22244     | gb ACT44975.1 50S ribosomal protein L3 [Escherichia coli BL21(DE3)]                                        |
| 0             | 66                        | 0                               | 70546     | BL21(DE3)]                                                                                                 |
| 0             | 80                        | 1                               | 78526     | gb ACT45071.1 4-alpha-glucanotransferase (amylomaltase) [Escherichia coli BL21(DE3)]                       |
| 0             | 122                       | 0                               | 9684      | BL21(DE3)]                                                                                                 |
| 0             | 206                       | 0                               | 11316     | BL21(DE3)]                                                                                                 |
| 4             | 309                       | 10                              | 17712     | BL21(DE3)]                                                                                                 |
| 2             | 235                       | 9                               | 37973     | gb ACT44368.1 recombinase A [Escherichia coli BL21(DE3)]                                                   |
| 0             | 79                        | 0                               | 92109     | BL21(DE3)]                                                                                                 |
| 3             | 276                       | 0                               | 14966     | BL21(DE3)]                                                                                                 |
| 0             | 529                       | 6                               | 9535      | gb ACT45669.1 HU DNA-binding transcriptional regulator alpha subunit [Escherichia coli BL21(DE3)]          |
| 2             | 64                        | 1                               | 21074     | gb ACT46031.1 periplasmic protein [Escherichia coli BL21(DE3)]                                             |
| 0             | 106                       | 0                               | 6372      | BL21(DE3)]                                                                                                 |
| 6             | 26                        | 6                               | 49594     | gb ACT45609.1 ATP-dependent protease ATP-binding subunit [Escherichia coli BL21(DE3)]                      |
| 5             | 47                        | 1                               | 35048     | gb ACT43641.1 fused mannose-specific PTS enzymes: IIA component/IIB component [Escherichia coli BL21(DE3)] |

Supplementary Table 7\_pESBL\_GIXhomolog.xlsx

**Supplementary Table 7. List of M.EcoGIX homologs**

Summary of BLAST against M.EcoGIX was shown (cut-off at E-value <1.00E-50). BLAST program was run at Kyoto Encyclopedia of Genes and Genomes. M.EcoGIX homologs encoded on plasmid are shown in black and those encoded on chromosome are shown in red.

| Org code* | Organism                                    | bits | E value   | coding replicon | coding region              |
|-----------|---------------------------------------------|------|-----------|-----------------|----------------------------|
| esl       | Escherichia coli O104 H4 2011C-3493         | 478  | 7.00E-170 | pESBL-EA11      | 54782..55465               |
| elu       | Escherichia coli UM146                      | 461  | 2.00E-163 | pUM146          | complement(51505..52188)   |
| ese       | Escherichia coli O150:H5 SE15 (commensal)   | 461  | 2.00E-163 | pECSF1          | 113742..114425             |
| eum       | Escherichia coli O17:K52:H18 UMN026 (ExPEC) | 461  | 2.00E-163 | p1ESCUM         | complement(105909..106592) |
| eci       | Escherichia coli O18:K1:H7 UTI89 (UPEC)     | 461  | 2.00E-163 | pUTI89          | 62243..62926               |
| ecy       | Escherichia coli O152:H28 SE11 (commensal)  | 459  | 1.00E-162 | pSE11-1         | 33937..34620               |
| ecoj      | Escherichia coli JJ1886                     | 458  | 3.00E-162 | pJJ1886_5       | 12491..13174               |
| ell       | Escherichia coli W                          | 458  | 3.00E-162 | pRK1            | 91798..92481               |
| elw       | Escherichia coli W                          | 458  | 3.00E-162 | pRK1            | 98814..99497               |
| eko       | Escherichia coli KO11FL                     | 458  | 3.00E-162 | pEKO1101        | 15429..16112               |
| ecy       | Escherichia coli O152:H28 SE11 (commensal)  | 457  | 5.00E-162 | pSE11-2         | 24170..24853               |
| eun       | Escherichia coli UMNK88                     | 457  | 1.00E-161 | pUMNK88_91      | 18267..18950               |
| sfe       | Shigella flexneri 2002017 (serotype Fxv)    | 457  | 1.00E-161 | pSFxv_1         | 163189..163872             |

Supplementary Table 7\_pESBL\_GIXhomolog.xlsx

**Supplementary Table 7. List of M.EcoGIX homologs**

Summary of BLAST against M.EcoGIX was shown (cut-off at E-value <1.00E-50).es (KEGG) and their organism code\*, along M.EcoGIX homologs encoded on plasmid are shown in black and those encode

| Org code* | Organism                                    | homology                                                                   |
|-----------|---------------------------------------------|----------------------------------------------------------------------------|
| esl       | Escherichia coli O104 H4 2011C-3493         | Identities = 227/227 (100%), Positives = 227/227 (100%), Gaps = 0/227 (0%) |
| elu       | Escherichia coli UM146                      | Identities = 219/227 (96%), Positives = 223/227 (98%), Gaps = 0/227 (0%)   |
| ese       | Escherichia coli O150:H5 SE15 (commensal)   | Identities = 219/227 (96%), Positives = 223/227 (98%), Gaps = 0/227 (0%)   |
| eum       | Escherichia coli O17:K52:H18 UMN026 (ExPEC) | Identities = 219/227 (96%), Positives = 223/227 (98%), Gaps = 0/227 (0%)   |
| eci       | Escherichia coli O18:K1:H7 UTI89 (UPEC)     | Identities = 219/227 (96%), Positives = 223/227 (98%), Gaps = 0/227 (0%)   |
| ecy       | Escherichia coli O152:H28 SE11 (commensal)  | Identities = 217/227 (96%), Positives = 221/227 (97%), Gaps = 0/227 (0%)   |
| ecoj      | Escherichia coli JJ1886                     | Identities = 216/227 (95%), Positives = 220/227 (97%), Gaps = 0/227 (0%)   |
| ell       | Escherichia coli W                          | Identities = 216/227 (95%), Positives = 221/227 (97%), Gaps = 0/227 (0%)   |
| elw       | Escherichia coli W                          | Identities = 216/227 (95%), Positives = 221/227 (97%), Gaps = 0/227 (0%)   |
| eko       | Escherichia coli KO11FL                     | Identities = 216/227 (95%), Positives = 221/227 (97%), Gaps = 0/227 (0%)   |
| ecy       | Escherichia coli O152:H28 SE11 (commensal)  | Identities = 216/227 (95%), Positives = 221/227 (97%), Gaps = 0/227 (0%)   |
| eun       | Escherichia coli UMNK88                     | Identities = 215/227 (95%), Positives = 221/227 (97%), Gaps = 0/227 (0%)   |
| sfe       | Shigella flexneri 2002017 (serotype Fxv)    | Identities = 215/227 (95%), Positives = 220/227 (97%), Gaps = 0/227 (0%)   |

Supplementary Table 7\_pESBL\_GIXhomolog.xlsx

**Supplementary Table 7. List of M.EcoGIX homologs**

Summary of BLAST against M.EcoGIX was shown (cut-off at E-value <1.00E-50). BLAST program was run at Kyoto Encyclopedia of Genes and Genomes. M.EcoGIX homologs encoded on plasmid are shown in black and those encoded on chromosome are shown in red.

| Org code* | Organism                                                         | bits | E value   | coding replicon             | coding region            |
|-----------|------------------------------------------------------------------|------|-----------|-----------------------------|--------------------------|
| sfl       | Shigella flexneri 301 (serotype 2a)                              | 457  | 1.00E-161 | pCP301                      | 164527..165210           |
| seeh      | Salmonella enterica subsp. enterica serovar Heidelberg 41578     | 457  | 1.00E-161 | pSEEH1578_01                | complement(48350..49033) |
| senh      | Salmonella enterica subsp. enterica Serovar Heidelberg CFSAN0020 | 457  | 1.00E-161 | pCFSAN002069_0158902..59585 |                          |
| seb       | Salmonella enterica subsp. enterica serovar Typhimurium ST4/74   | 457  | 1.00E-161 | TY474p2                     | 18806..19489             |
| sey       | Salmonella enterica subsp. enterica serovar Typhimurium SL1344   | 457  | 1.00E-161 | pCol1B9_SL1344              | 18806..19489             |
| ecw       | Escherichia coli E24377A (ETEC)                                  | 456  | 2.00E-161 | pETEC_73                    | complement(5475..6158)   |
| seh       | Salmonella enterica subsp. enterica serovar Heidelberg SL476     | 456  | 3.00E-161 | pSL476_91                   | 23880..24563             |
| ecoo      | Escherichia coli O145:H28 RM13514 (EHEC)                         | 454  | 1.00E-160 | pO145-13514                 | 21019..21702             |
| eoj       | Escherichia coli O26:H11 11368 (EHEC)                            | 454  | 1.00E-160 | pO26_1                      | 54551..55234             |
| sec       | Salmonella enterica subsp. enterica serovar Choleraesuis         | 451  | 3.00E-159 | pSC138                      | complement(96052..96735) |
| ecw       | Escherichia coli E24377A (ETEC)                                  | 443  | 3.00E-156 | pETEC_35                    | complement(18014..18697) |
| elh       | Escherichia coli O78:H11:K80 H10407 (ETEC)                       | 441  | 1.00E-155 | p666                        | complement(42959..43642) |
| elx       | Escherichia coli O157:H7 Xuzhou21 (EHEC)                         | 441  | 2.00E-155 | pO157                       | 39364..40047             |



Supplementary Table 7\_pESBL\_GIXhomolog.xlsx

**Supplementary Table 7. List of M.EcoGIX homologs**

Summary of BLAST against M.EcoGIX was shown (cut-off at E-value <1.00E-50).es (KEGG) and their organism code\*, along M.EcoGIX homologs encoded on plasmid are shown in black and those encode

| Org code* | Organism                                                         | homology                                                                 |
|-----------|------------------------------------------------------------------|--------------------------------------------------------------------------|
| sfl       | Shigella flexneri 301 (serotype 2a)                              | Identities = 215/227 (95%), Positives = 220/227 (97%), Gaps = 0/227 (0%) |
| seeh      | Salmonella enterica subsp. enterica serovar Heidelberg 41578     | Identities = 215/227 (95%), Positives = 221/227 (97%), Gaps = 0/227 (0%) |
| senh      | Salmonella enterica subsp. enterica Serovar Heidelberg CFSAN0020 | Identities = 215/227 (95%), Positives = 221/227 (97%), Gaps = 0/227 (0%) |
| seb       | Salmonella enterica subsp. enterica serovar Typhimurium ST4/74   | Identities = 215/227 (95%), Positives = 221/227 (97%), Gaps = 0/227 (0%) |
| sey       | Salmonella enterica subsp. enterica serovar Typhimurium SL1344   | Identities = 215/227 (95%), Positives = 221/227 (97%), Gaps = 0/227 (0%) |
| ecw       | Escherichia coli E24377A (ETEC)                                  | Identities = 215/227 (95%), Positives = 220/227 (97%), Gaps = 0/227 (0%) |
| seh       | Salmonella enterica subsp. enterica serovar Heidelberg SL476     | Identities = 214/227 (94%), Positives = 219/227 (96%), Gaps = 0/227 (0%) |
| ecoo      | Escherichia coli O145:H28 RM13514 (EHEC)                         | Identities = 217/227 (96%), Positives = 220/227 (97%), Gaps = 0/227 (0%) |
| eoj       | Escherichia coli O26:H11 11368 (EHEC)                            | Identities = 217/227 (96%), Positives = 220/227 (97%), Gaps = 0/227 (0%) |
| sec       | Salmonella enterica subsp. enterica serovar Choleraesuis         | Identities = 212/227 (93%), Positives = 218/227 (96%), Gaps = 0/227 (0%) |
| ecw       | Escherichia coli E24377A (ETEC)                                  | Identities = 207/227 (91%), Positives = 216/227 (95%), Gaps = 0/227 (0%) |
| elh       | Escherichia coli O78:H11:K80 H10407 (ETEC)                       | Identities = 208/227 (92%), Positives = 216/227 (95%), Gaps = 0/227 (0%) |
| elx       | Escherichia coli O157:H7 Xuzhou21 (EHEC)                         | Identities = 206/227 (91%), Positives = 214/227 (94%), Gaps = 0/227 (0%) |

Supplementary Table 7\_pESBL\_GIXhomolog.xlsx

**Supplementary Table 7. List of M.EcoGIX homologs**

Summary of BLAST against M.EcoGIX was shown (cut-off at E-value <1.00E-50). BLAST program was run at Kyoto Encyclopedia of Genes and Genomes. M.EcoGIX homologs encoded on plasmid are shown in black and those encoded on chromosome are shown in red.

| Org code* | Organism                                                      | bits | E value   | coding replicon | coding region            |
|-----------|---------------------------------------------------------------|------|-----------|-----------------|--------------------------|
| etw       | Escherichia coli O157:H7 TW14359 (EHEC)                       | 441  | 2.00E-155 | pO157           | 38985..39668             |
| ecf       | Escherichia coli O157:H7 EC4115 (EHEC)                        | 441  | 2.00E-155 | pO157           | 22903..23586             |
| ecs       | Escherichia coli O157:H7 Sakai (EHEC)                         | 441  | 2.00E-155 | pO157           | 39363..40046             |
| ece       | Escherichia coli O157:H7 EDL933 (EHEC)                        | 441  | 2.00E-155 | pO157           | 61938..62621             |
| elo       | Escherichia coli O44:H18 042 (EAEC)                           | 440  | 3.00E-155 | pAA             | complement(98577..99260) |
| eun       | Escherichia coli UMNK88                                       | 438  | 3.00E-154 | pUMNK88_Hly     | 62587..63270             |
| setu      | Salmonella enterica subsp. enterica serovar Typhimurium U288  | 438  | 3.00E-154 | pSTU288-1       | complement(11966..12649) |
| elr       | Escherichia coli O55:H7 RM12579 (EPEC)                        | 434  | 6.00E-153 | p12579_2        | 63539..64222             |
| eok       | Escherichia coli O55:H7 CB9615 (EPEC)                         | 434  | 6.00E-153 | pO55            | 63573..64256             |
| eoj       | Escherichia coli O26:H11 11368 (EHEC)                         | 433  | 2.00E-152 | pO26_2          | 8479..9162               |
| seeb      | Salmonella enterica subsp. enterica serovar Bareilly          | 413  | 2.00E-144 | unnamed         | complement(49888..50565) |
| send      | Salmonella enterica subsp. enterica serovar Typhimurium DT104 | 410  | 3.00E-143 | pDT104          | 49478..50158             |
| setu      | Salmonella enterica subsp. enterica serovar Typhimurium U288  | 410  | 3.00E-143 | pSTU288-1       | complement(86987..87667) |

Supplementary Table 7\_pESBL\_GIXhomolog.xlsx

**Supplementary Table 7. List of M.EcoGIX homologs**

Summary of BLAST against M.EcoGIX was shown (cut-off at E-value <1.00E-50).es (KEGG) and their organism code\*, along M.EcoGIX homologs encoded on plasmid are shown in black and **those encode**

| <b>Org code*</b> | <b>Organism</b>                                               | <b>homology</b>                                                          |
|------------------|---------------------------------------------------------------|--------------------------------------------------------------------------|
| etw              | Escherichia coli O157:H7 TW14359 (EHEC)                       | Identities = 206/227 (91%), Positives = 214/227 (94%), Gaps = 0/227 (0%) |
| ecf              | Escherichia coli O157:H7 EC4115 (EHEC)                        | Identities = 206/227 (91%), Positives = 214/227 (94%), Gaps = 0/227 (0%) |
| ecs              | Escherichia coli O157:H7 Sakai (EHEC)                         | Identities = 206/227 (91%), Positives = 214/227 (94%), Gaps = 0/227 (0%) |
| ece              | Escherichia coli O157:H7 EDL933 (EHEC)                        | Identities = 206/227 (91%), Positives = 214/227 (94%), Gaps = 0/227 (0%) |
| elo              | Escherichia coli O44:H18 042 (EAEC)                           | Identities = 206/227 (91%), Positives = 215/227 (95%), Gaps = 0/227 (0%) |
| eun              | Escherichia coli UMNK88                                       | Identities = 205/227 (90%), Positives = 213/227 (94%), Gaps = 0/227 (0%) |
| setu             | Salmonella enterica subsp. enterica serovar Typhimurium U288  | Identities = 205/227 (90%), Positives = 214/227 (94%), Gaps = 0/227 (0%) |
| elr              | Escherichia coli O55:H7 RM12579 (EPEC)                        | Identities = 203/227 (89%), Positives = 212/227 (93%), Gaps = 0/227 (0%) |
| eok              | Escherichia coli O55:H7 CB9615 (EPEC)                         | Identities = 203/227 (89%), Positives = 212/227 (93%), Gaps = 0/227 (0%) |
| eoj              | Escherichia coli O26:H11 11368 (EHEC)                         | Identities = 203/227 (89%), Positives = 213/227 (94%), Gaps = 0/227 (0%) |
| seeb             | Salmonella enterica subsp. enterica serovar Bareilly          | Identities = 195/227 (86%), Positives = 209/227 (92%), Gaps = 2/227 (1%) |
| send             | Salmonella enterica subsp. enterica serovar Typhimurium DT104 | Identities = 190/227 (84%), Positives = 210/227 (93%), Gaps = 1/227 (0%) |
| setu             | Salmonella enterica subsp. enterica serovar Typhimurium U288  | Identities = 190/227 (84%), Positives = 210/227 (93%), Gaps = 1/227 (0%) |

Supplementary Table 7\_pESBL\_GIXhomolog.xlsx

**Supplementary Table 7. List of M.EcoGIX homologs**

Summary of BLAST against M.EcoGIX was shown (cut-off at E-value <1.00E-50). BLAST program was run at Kyoto Encyclopedia of Genes and Genomes. M.EcoGIX homologs encoded on plasmid are shown in black and those encoded on chromosome are shown in red.

| Org code* | Organism                                                        | bits | E value   | coding replicon | coding region            |
|-----------|-----------------------------------------------------------------|------|-----------|-----------------|--------------------------|
| sef       | Salmonella enterica subsp. enterica serovar Typhimurium 798     | 410  | 3.00E-143 | p798_93         | 49384..50064             |
| seb       | Salmonella enterica subsp. enterica serovar Typhimurium ST4/74  | 410  | 3.00E-143 | TY474p1         | complement(43674..44354) |
| sej       | Salmonella enterica subsp. enterica serovar Typhimurium UK-1    | 410  | 3.00E-143 | pSTUK-100       | 31259..31939             |
| sem       | Salmonella enterica subsp. enterica serovar Typhimurium T000240 | 410  | 3.00E-143 | pSTMDT12_L      | 62102..62782             |
| sey       | Salmonella enterica subsp. enterica serovar Typhimurium SL1344  | 410  | 3.00E-143 | pSLT_SL1344     | complement(43674..44354) |
| seo       | Salmonella enterica subsp. enterica serovar Typhimurium 14028S  | 410  | 3.00E-143 | unnamed         | 49478..50158             |
| stm       | Salmonella enterica subsp. enterica serovar Typhimurium LT2     | 410  | 3.00E-143 | pSLT            | 49486..50166             |
| sbz       | Salmonella bongori N268-08                                      | 410  | 4.00E-143 | RM1             | complement(49063..49743) |
| yph       | Yersinia pestis biovar Medievalis Harbin 35                     | 409  | 1.00E-142 | pMT             | complement(80298..80975) |
| yph       | Yersinia pestis D182038                                         | 409  | 1.00E-142 | pMT1            | 89918..90595             |
| ypd       | Yersinia pestis D106004                                         | 409  | 1.00E-142 | pMT1            | 88121..88798             |
| ypt       | Yersinia pestis A1122                                           | 409  | 1.00E-142 | unnamed         | complement(41449..42126) |
| ypz       | Yersinia pestis Z176003                                         | 409  | 1.00E-142 | pMT1            | 88123..88800             |
| ypp       | Yersinia pestis Pestoides F                                     | 409  | 1.00E-142 | MT              | 130882..131559           |

Supplementary Table 7\_pESBL\_GIXhomolog.xlsx

**Supplementary Table 7. List of M.EcoGIX homologs**

Summary of BLAST against M.EcoGIX was shown (cut-off at E-value <1.00E-50).es (KEGG) and their organism code\*, along M.EcoGIX homologs encoded on plasmid are shown in black and those encode

| Org code* | Organism                                                        | homology                                                                 |
|-----------|-----------------------------------------------------------------|--------------------------------------------------------------------------|
| sef       | Salmonella enterica subsp. enterica serovar Typhimurium 798     | Identities = 190/227 (84%), Positives = 210/227 (93%), Gaps = 1/227 (0%) |
| seb       | Salmonella enterica subsp. enterica serovar Typhimurium ST4/74  | Identities = 190/227 (84%), Positives = 210/227 (93%), Gaps = 1/227 (0%) |
| sej       | Salmonella enterica subsp. enterica serovar Typhimurium UK-1    | Identities = 190/227 (84%), Positives = 210/227 (93%), Gaps = 1/227 (0%) |
| sem       | Salmonella enterica subsp. enterica serovar Typhimurium T000240 | Identities = 190/227 (84%), Positives = 210/227 (93%), Gaps = 1/227 (0%) |
| sey       | Salmonella enterica subsp. enterica serovar Typhimurium SL1344  | Identities = 190/227 (84%), Positives = 210/227 (93%), Gaps = 1/227 (0%) |
| seo       | Salmonella enterica subsp. enterica serovar Typhimurium 14028S  | Identities = 190/227 (84%), Positives = 210/227 (93%), Gaps = 1/227 (0%) |
| stm       | Salmonella enterica subsp. enterica serovar Typhimurium LT2     | Identities = 190/227 (84%), Positives = 210/227 (93%), Gaps = 1/227 (0%) |
| sbz       | Salmonella bongori N268-08                                      | Identities = 191/227 (84%), Positives = 211/227 (93%), Gaps = 1/227 (0%) |
| yph       | Yersinia pestis biovar Medievalis Harbin 35                     | Identities = 193/227 (85%), Positives = 208/227 (92%), Gaps = 2/227 (1%) |
| ypx       | Yersinia pestis D182038                                         | Identities = 193/227 (85%), Positives = 208/227 (92%), Gaps = 2/227 (1%) |
| ypd       | Yersinia pestis D106004                                         | Identities = 193/227 (85%), Positives = 208/227 (92%), Gaps = 2/227 (1%) |
| ypt       | Yersinia pestis A1122                                           | Identities = 193/227 (85%), Positives = 208/227 (92%), Gaps = 2/227 (1%) |
| ypz       | Yersinia pestis Z176003                                         | Identities = 193/227 (85%), Positives = 208/227 (92%), Gaps = 2/227 (1%) |
| ypp       | Yersinia pestis Pestoides F                                     | Identities = 193/227 (85%), Positives = 208/227 (92%), Gaps = 2/227 (1%) |

Supplementary Table 7\_pESBL\_GIXhomolog.xlsx

**Supplementary Table 7. List of M.EcoGIX homologs**

Summary of BLAST against M.EcoGIX was shown (cut-off at E-value <1.00E-50). BLAST program was run at Kyoto Encyclopedia of Genes and Genomes. M.EcoGIX homologs encoded on plasmid are shown in black and those encoded on chromosome are shown in red.

| Org code* | Organism                                          | bits | E value   | coding replicon | coding region              |
|-----------|---------------------------------------------------|------|-----------|-----------------|----------------------------|
| ypm       | Yersinia pestis 91001 (biovar Microtus)           | 409  | 1.00E-142 | pMT1            | complement(89397..90074)   |
| ypn       | Yersinia pestis Nepal516 (biovar Antiqua)         | 409  | 1.00E-142 | pMT             | 94790..95467               |
| ypa       | Yersinia pestis Antiqua (biovar Antiqua)          | 409  | 1.00E-142 | pMT             | 90345..91022               |
| ypk       | Yersinia pestis KIM10+ (biovar Mediaevalis)       | 409  | 1.00E-142 | pMT-1           | 66648..67325               |
| ype       | Yersinia pestis CO92 (biovar Orientalis)          | 409  | 1.00E-142 | pMT1            | complement(64672..65349)   |
| ypg       | Yersinia pestis Angola                            | 408  | 2.00E-142 | pMT-pPCP        | 108442..109119             |
| eun       | Escherichia coli UMNK88                           | 403  | 1.00E-140 | pUMNK88_Ent     | complement(71868..72521)   |
| ebi       | Erwinia billingiae                                | 391  | 1.00E-135 | pEB170          | 122412..123092             |
| eay       | Erwinia amylovora ATCC 49946                      | 388  | 1.00E-134 | p2              | 13056..13736               |
| eclo      | Enterobacter cloacae subsp. cloacae NCTC 9394     | 340  | 7.00E-116 | chromosome      | 3619987..3620679           |
| enc       | Enterobacter cloacae subsp. cloacae ATCC 13047    | 339  | 2.00E-115 | pECL_A          | 53792..54484               |
| kpm       | Klebsiella pneumoniae subsp. pneumoniae HS11286   | 335  | 7.00E-114 | pKPHS2          | complement(100181..100882) |
| kpn       | Klebsiella pneumoniae subsp. pneumoniae MGH 78578 | 333  | 5.00E-113 | pKPN4           | 52613..53314               |

Supplementary Table 7\_pESBL\_GIXhomolog.xlsx

**Supplementary Table 7. List of M.EcoGIX homologs**

Summary of BLAST against M.EcoGIX was shown (cut-off at E-value <1.00E-50).es (KEGG) and their organism code\*, along M.EcoGIX homologs encoded on plasmid are shown in black and those encode

| Org code* | Organism                                          | homology                                                                 |
|-----------|---------------------------------------------------|--------------------------------------------------------------------------|
| ypm       | Yersinia pestis 91001 (biovar Microtus)           | Identities = 193/227 (85%), Positives = 208/227 (92%), Gaps = 2/227 (1%) |
| ypn       | Yersinia pestis Nepal516 (biovar Antiqua)         | Identities = 193/227 (85%), Positives = 208/227 (92%), Gaps = 2/227 (1%) |
| ypa       | Yersinia pestis Antiqua (biovar Antiqua)          | Identities = 193/227 (85%), Positives = 208/227 (92%), Gaps = 2/227 (1%) |
| ypk       | Yersinia pestis KIM10+ (biovar Mediaevalis)       | Identities = 193/227 (85%), Positives = 208/227 (92%), Gaps = 2/227 (1%) |
| ype       | Yersinia pestis CO92 (biovar Orientalis)          | Identities = 193/227 (85%), Positives = 208/227 (92%), Gaps = 2/227 (1%) |
| ypg       | Yersinia pestis Angola                            | Identities = 192/227 (85%), Positives = 208/227 (92%), Gaps = 2/227 (1%) |
| eun       | Escherichia coli UMNK88                           | Identities = 190/203 (94%), Positives = 194/203 (96%), Gaps = 0/203 (0%) |
| ebi       | Erwinia billingiae                                | Identities = 182/227 (80%), Positives = 200/227 (88%), Gaps = 1/227 (0%) |
| eay       | Erwinia amylovora ATCC 49946                      | Identities = 180/227 (79%), Positives = 202/227 (89%), Gaps = 1/227 (0%) |
| eclo      | Enterobacter cloacae subsp. cloacae NCTC 9394     | Identities = 155/225 (69%), Positives = 184/225 (82%), Gaps = 0/225 (0%) |
| enc       | Enterobacter cloacae subsp. cloacae ATCC 13047    | Identities = 155/225 (69%), Positives = 184/225 (82%), Gaps = 0/225 (0%) |
| kpm       | Klebsiella pneumoniae subsp. pneumoniae HS11286   | Identities = 164/234 (70%), Positives = 186/234 (79%), Gaps = 8/234 (3%) |
| kpn       | Klebsiella pneumoniae subsp. pneumoniae MGH 78578 | Identities = 163/234 (70%), Positives = 185/234 (79%), Gaps = 8/234 (3%) |

Supplementary Table 7\_pESBL\_GIXhomolog.xlsx

**Supplementary Table 7. List of M.EcoGIX homologs**

Summary of BLAST against M.EcoGIX was shown (cut-off at E-value <1.00E-50). BLAST program was run at Kyoto Encyclopedia of Genes and Genomes. M.EcoGIX homologs encoded on plasmid are shown in black and those encoded on chromosome are shown in red.

| Org code* | Organism                                          | bits | E value   | coding replicon | coding region              |
|-----------|---------------------------------------------------|------|-----------|-----------------|----------------------------|
| kpa       | Klebsiella pneumoniae 30660/NJST258_1             | 334  | 5.00E-113 | pNJST258N2      | 10504..11280               |
| kpn       | Klebsiella pneumoniae subsp. pneumoniae MGH 78578 | 331  | 4.00E-112 | pKPN5           | complement(9138..9839)     |
| kps       | Klebsiella pneumoniae 30684/NJST258_2             | 320  | 2.00E-107 | pNJST258C1      | 12170..12946               |
| asa       | Aeromonas salmonicida                             | 317  | 7.00E-107 | p5              | complement(130148..130792) |
| kpr       | Klebsiella pneumoniae                             | 315  | 5.00E-106 | pKRH            | complement(99752..100453)  |
| enr       | Enterobacter sp. R4-368                           | 315  | 6.00E-106 | pENT01          | complement(110872..111525) |
| pao       | Pantoea sp. At-9b                                 | 315  | 6.00E-106 | pPAT9B05        | 49614..50258               |
| rah       | Rahnella sp. Y9602                                | 314  | 8.00E-106 | pRAHAQ02        | complement(16681..17325)   |
| srl       | Serratia plymuthica 4Rx13                         | 303  | 2.00E-101 | p75             | 5666..6310                 |
| koe       | Klebsiella oxytoca E718                           | 296  | 2.00E-99  | pKOX_NDM1       | complement(107602..108099) |
| ecoi      | Escherichia coli PMV-1                            | 288  | 3.00E-96  | pHUSEC411like   | 11492..11995               |
| pva       | Pantoea vagans                                    | 295  | 2.00E-90  | pPag2           | complement(113008..115737) |
| bgl       | Burkholderia glumae                               | 272  | 4.00E-89  | bglu_3p         | complement(70623..71276)   |



Supplementary Table 7\_pESBL\_GIXhomolog.xlsx

**Supplementary Table 7. List of M.EcoGIX homologs**

Summary of BLAST against M.EcoGIX was shown (cut-off at E-value <1.00E-50).es (KEGG) and their organism code\*, along M.EcoGIX homologs encoded on plasmid are shown in black and **those encode**

| Org code* | Organism                                          | homology                                                                 |
|-----------|---------------------------------------------------|--------------------------------------------------------------------------|
| kpa       | Klebsiella pneumoniae 30660/NJST258_1             | Identities = 163/234 (70%), Positives = 185/234 (79%), Gaps = 8/234 (3%) |
| kpn       | Klebsiella pneumoniae subsp. pneumoniae MGH 78578 | Identities = 162/234 (69%), Positives = 184/234 (79%), Gaps = 8/234 (3%) |
| kps       | Klebsiella pneumoniae 30684/NJST258_2             | Identities = 161/234 (69%), Positives = 185/234 (79%), Gaps = 8/234 (3%) |
| asa       | Aeromonas salmonicida                             | Identities = 145/205 (71%), Positives = 169/205 (82%), Gaps = 0/205 (0%) |
| kpr       | Klebsiella pneumoniae                             | Identities = 150/208 (72%), Positives = 169/208 (81%), Gaps = 7/208 (3%) |
| enr       | Enterobacter sp. R4-368                           | Identities = 147/217 (68%), Positives = 174/217 (80%), Gaps = 1/217 (0%) |
| pao       | Pantoea sp. At-9b                                 | Identities = 148/211 (70%), Positives = 172/211 (82%), Gaps = 1/211 (0%) |
| rah       | Rahnella sp. Y9602                                | Identities = 144/211 (68%), Positives = 169/211 (80%), Gaps = 0/211 (0%) |
| srl       | Serratia plymuthica 4Rx13                         | Identities = 140/201 (70%), Positives = 164/201 (82%), Gaps = 0/201 (0%) |
| koe       | Klebsiella oxytoca E718                           | Identities = 143/167 (86%), Positives = 153/167 (92%), Gaps = 2/167 (1%) |
| ecoi      | Escherichia coli PMV-1                            | Identities = 143/170 (84%), Positives = 149/170 (88%), Gaps = 3/170 (2%) |
| pva       | Pantoea vagans                                    | Identities = 133/205 (65%), Positives = 161/205 (79%), Gaps = 6/205 (3%) |
| bgl       | Burkholderia glumae                               | Identities = 129/217 (59%), Positives = 157/217 (72%), Gaps = 0/217 (0%) |

Supplementary Table 7\_pESBL\_GIXhomolog.xlsx

**Supplementary Table 7. List of M.EcoGIX homologs**

Summary of BLAST against M.EcoGIX was shown (cut-off at E-value <1.00E-50). BLAST program was run at Kyoto Encyclopedia of Genes and Genomes. M.EcoGIX homologs encoded on plasmid are shown in black and those encoded on chromosome are shown in red.

| Org code* | Organism                        | bits | E value  | coding replicon | coding region            |
|-----------|---------------------------------|------|----------|-----------------|--------------------------|
| bgd       | Burkholderia gladioli           | 270  | 3.00E-88 | bgla_2p         | complement(71826..72482) |
| bgd       | Burkholderia gladioli           | 268  | 9.00E-88 | bgla_1p         | complement(50215..50871) |
| put       | Pusillimonas sp. T7-7           | 267  | 1.00E-87 | chromosome      | 271186..271749           |
| bgl       | Burkholderia glumae             | 263  | 1.00E-85 | bglu_4p         | complement(73168..73821) |
| brh       | Burkholderia rhizoxinica        | 263  | 2.00E-85 | pBRH02          | 44352..45065             |
| nha       | Nitrobacter hamburgensis        | 250  | 1.00E-80 | chromosome      | 630346..630993           |
| bcj       | Burkholderia cenocepacia J2315  | 249  | 3.00E-80 | pBCJ2315        | complement(73946..74599) |
| bch       | Burkholderia cenocepacia HI2424 | 247  | 7.00E-78 | p1              | 147027..148010           |
| ecw       | Escherichia coli E24377A (ETEC) | 241  | 3.00E-76 | pETEC_74        | 27397..28182             |
| ret       | Rhizobium etli CFN 42           | 236  | 3.00E-75 | chromosome      | 2062703..2063347         |
| pde       | Paracoccus denitrificans        | 232  | 2.00E-73 | chromosome 2    | 511449..512126           |
| pde       | Paracoccus denitrificans        | 231  | 9.00E-73 | chromosome 2    | 338133..338810           |
| pde       | Paracoccus denitrificans        | 228  | 6.00E-72 | chromosome 1    | 110943..111620           |

Supplementary Table 7\_pESBL\_GIXhomolog.xlsx

**Supplementary Table 7. List of M.EcoGIX homologs**

Summary of BLAST against M.EcoGIX was shown (cut-off at E-value <1.00E-50).es (KEGG) and their organism code\*, along M.EcoGIX homologs encoded on plasmid are shown in black and those encode

| Org code* | Organism                        | homology                                                                 |
|-----------|---------------------------------|--------------------------------------------------------------------------|
| bgd       | Burkholderia gladioli           | Identities = 124/207 (60%), Positives = 156/207 (75%), Gaps = 0/207 (0%) |
| bgd       | Burkholderia gladioli           | Identities = 123/206 (60%), Positives = 155/206 (75%), Gaps = 0/206 (0%) |
| put       | Pusillimonas sp. T7-7           | Identities = 125/187 (67%), Positives = 145/187 (78%), Gaps = 0/187 (0%) |
| bgl       | Burkholderia glumae             | Identities = 123/204 (60%), Positives = 150/204 (74%), Gaps = 0/204 (0%) |
| brh       | Burkholderia rhizoxinica        | Identities = 124/210 (59%), Positives = 156/210 (74%), Gaps = 4/210 (2%) |
| nha       | Nitrobacter hamburgensis        | Identities = 117/201 (58%), Positives = 147/201 (73%), Gaps = 0/201 (0%) |
| bcj       | Burkholderia cenocepacia J2315  | Identities = 123/205 (60%), Positives = 152/205 (74%), Gaps = 0/205 (0%) |
| bch       | Burkholderia cenocepacia HI2424 | Identities = 121/199 (61%), Positives = 150/199 (75%), Gaps = 0/199 (0%) |
| ecw       | Escherichia coli E24377A (ETEC) | Identities = 108/116 (93%), Positives = 112/116 (97%), Gaps = 0/116 (0%) |
| ret       | Rhizobium etli CFN 42           | Identities = 108/202 (53%), Positives = 142/202 (70%), Gaps = 0/202 (0%) |
| pde       | Paracoccus denitrificans        | Identities = 107/211 (51%), Positives = 148/211 (70%), Gaps = 0/211 (0%) |
| pde       | Paracoccus denitrificans        | Identities = 106/210 (50%), Positives = 146/210 (70%), Gaps = 0/210 (0%) |
| pde       | Paracoccus denitrificans        | Identities = 106/210 (50%), Positives = 145/210 (69%), Gaps = 0/210 (0%) |

Supplementary Table 7\_pESBL\_GIXhomolog.xlsx

**Supplementary Table 7. List of M.EcoGIX homologs**

Summary of BLAST against M.EcoGIX was shown (cut-off at E-value <1.00E-50). BLAST program was run at Kyoto Encyclopedia of Genes and Genomes. M.EcoGIX homologs encoded on plasmid are shown in black and those encoded on chromosome are shown in red.

| Org code* | Organism                                        | bits | E value  | coding replicon | coding region               |
|-----------|-------------------------------------------------|------|----------|-----------------|-----------------------------|
| gdj       | Gluconacetobacter diazotrophicus PAI 5 (JGI)    | 228  | 9.00E-72 | chromosome      | complement(1788916..178951) |
| yel       | Yersinia enterocolitica LC20                    | 224  | 2.00E-71 | plasmid1_80K    | complement(69921..70331)    |
| gdj       | Gluconacetobacter diazotrophicus PAI 5 (JGI)    | 226  | 6.00E-71 | chromosome      | complement(1108484..110911) |
| gxl       | Gluconacetobacter xylinus E25                   | 222  | 2.00E-69 | chromosome      | complement(2630354..263101) |
| gdi       | Gluconacetobacter diazotrophicus PAI 5 (Brazil) | 221  | 7.00E-69 | chromosome      | 393090..393770              |
| goh       | Gluconobacter oxydans H24                       | 220  | 1.00E-68 | chromosome      | 1775734..1776414            |
| gdj       | Gluconacetobacter diazotrophicus PAI 5 (JGI)    | 212  | 2.00E-65 | chromosome      | complement(1202456..120311) |
| rli       | Roseobacter litoralis                           | 202  | 1.00E-61 | chromosome      | 1945360..1946040            |
| rli       | Roseobacter litoralis                           | 195  | 8.00E-59 | chromosome      | 3396622..3397302            |
| psts      | Plautia stali symbiont                          | 173  | 6.00E-52 | pPstS2          | 8150..8455                  |

Supplementary Table 7\_pESBL\_GIXhomolog.xlsx

**Supplementary Table 7. List of M.EcoGIX homologs**

Summary of BLAST against M.EcoGIX was shown (cut-off at E-value <1.00E-50).es (KEGG) and their organism code\*, along M.EcoGIX homologs encoded on plasmid are shown in black and those encode

| Org code* | Organism                                        | homology                                                                 |
|-----------|-------------------------------------------------|--------------------------------------------------------------------------|
| gdj       | Gluconacetobacter diazotrophicus PAI 5 (JGI)    | Identities = 104/200 (52%), Positives = 140/200 (70%), Gaps = 0/200 (0%) |
| yel       | Yersinia enterocolitica LC20                    | Identities = 111/135 (82%), Positives = 117/135 (87%), Gaps = 1/135 (1%) |
| gdj       | Gluconacetobacter diazotrophicus PAI 5 (JGI)    | Identities = 106/200 (53%), Positives = 140/200 (70%), Gaps = 0/200 (0%) |
| gxl       | Gluconacetobacter xylinus E25                   | Identities = 104/200 (52%), Positives = 138/200 (69%), Gaps = 0/200 (0%) |
| gdi       | Gluconacetobacter diazotrophicus PAI 5 (Brazil) | Identities = 105/200 (53%), Positives = 138/200 (69%), Gaps = 0/200 (0%) |
| goh       | Gluconobacter oxydans H24                       | Identities = 102/199 (51%), Positives = 137/199 (69%), Gaps = 0/199 (0%) |
| gdj       | Gluconacetobacter diazotrophicus PAI 5 (JGI)    | Identities = 98/200 (49%), Positives = 134/200 (67%), Gaps = 0/200 (0%)  |
| rli       | Roseobacter litoralis                           | Identities = 91/218 (42%), Positives = 136/218 (62%), Gaps = 0/218 (0%)  |
| rli       | Roseobacter litoralis                           | Identities = 86/209 (41%), Positives = 130/209 (62%), Gaps = 0/209 (0%)  |
| psts      | Plautia stali symbiont                          | Identities = 81/101 (80%), Positives = 85/101 (84%), Gaps = 0/101 (0%)   |
